# Supplementary material for: Hygroscopic behavior of aerosols generated from solutions of 3-methyl-1,2,3-butanetricarboxylic acid, its sodium salts, and its mixtures with NaCl
Source: Copernicus journal article supplement (doi:10.5194/acp-2020-428), 2020-05-29

1 Figure S1. (a) picture of the levitation experimental set up showing the coupling between the  
2 levitation cell and the Raman microspectrometer – The levitation cell was mounted on the XY  
3 stage and connected to the inlet and outlet for controlling RH – (b) zoom on the levitated particle  
4 exposed to green radiation (green point) through the objective with the collection of Raman  
5 backscattering signal using the same objective.  
6  
7  
8  
9  
10  
11  
12  
13  
14  
15  
16  
17  
18  
19  
20

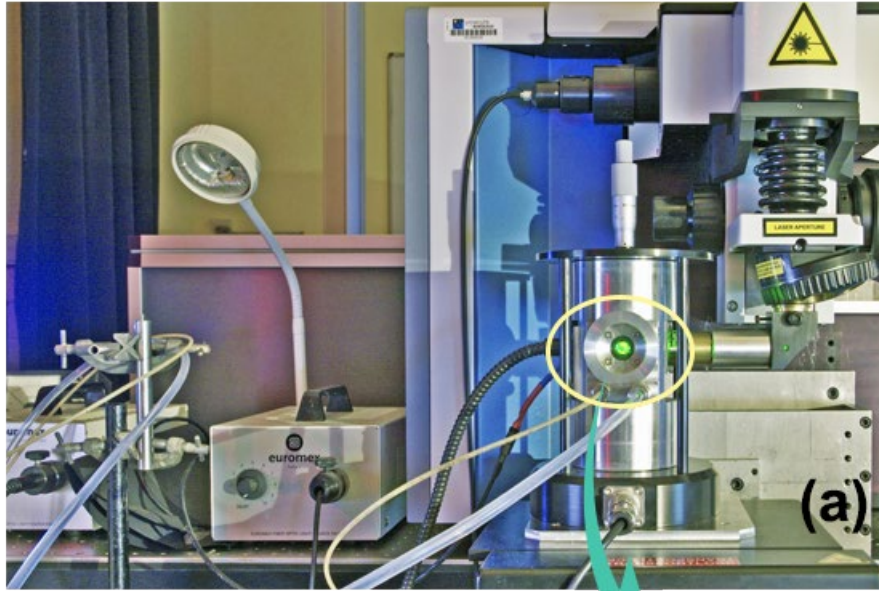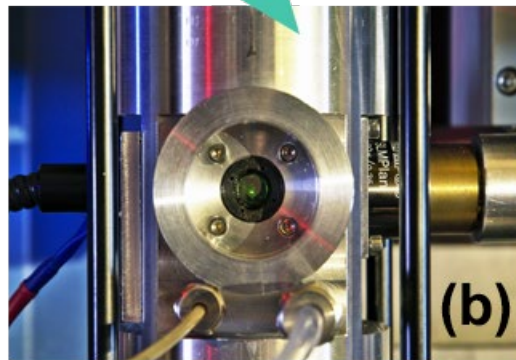

21 Figure S2. Hygroscopic curves, corresponding optical images, and Raman spectra at specific RHs of MBTCA:NaCl = (a) 1:1, (b) 1:2, and (c) 1:3  
 22 mixture particles in the levitation system. The recorded transition RHs during the humidification (H) and dehydration (D)  
 23 chemical compositions of the mixtures at certain RHs are marked with arrows in the hygroscopic curves. The phase notations shown in parenthesis  
 24 are s=solid; aq=aqueous; and as=amorphous solid.  
 25

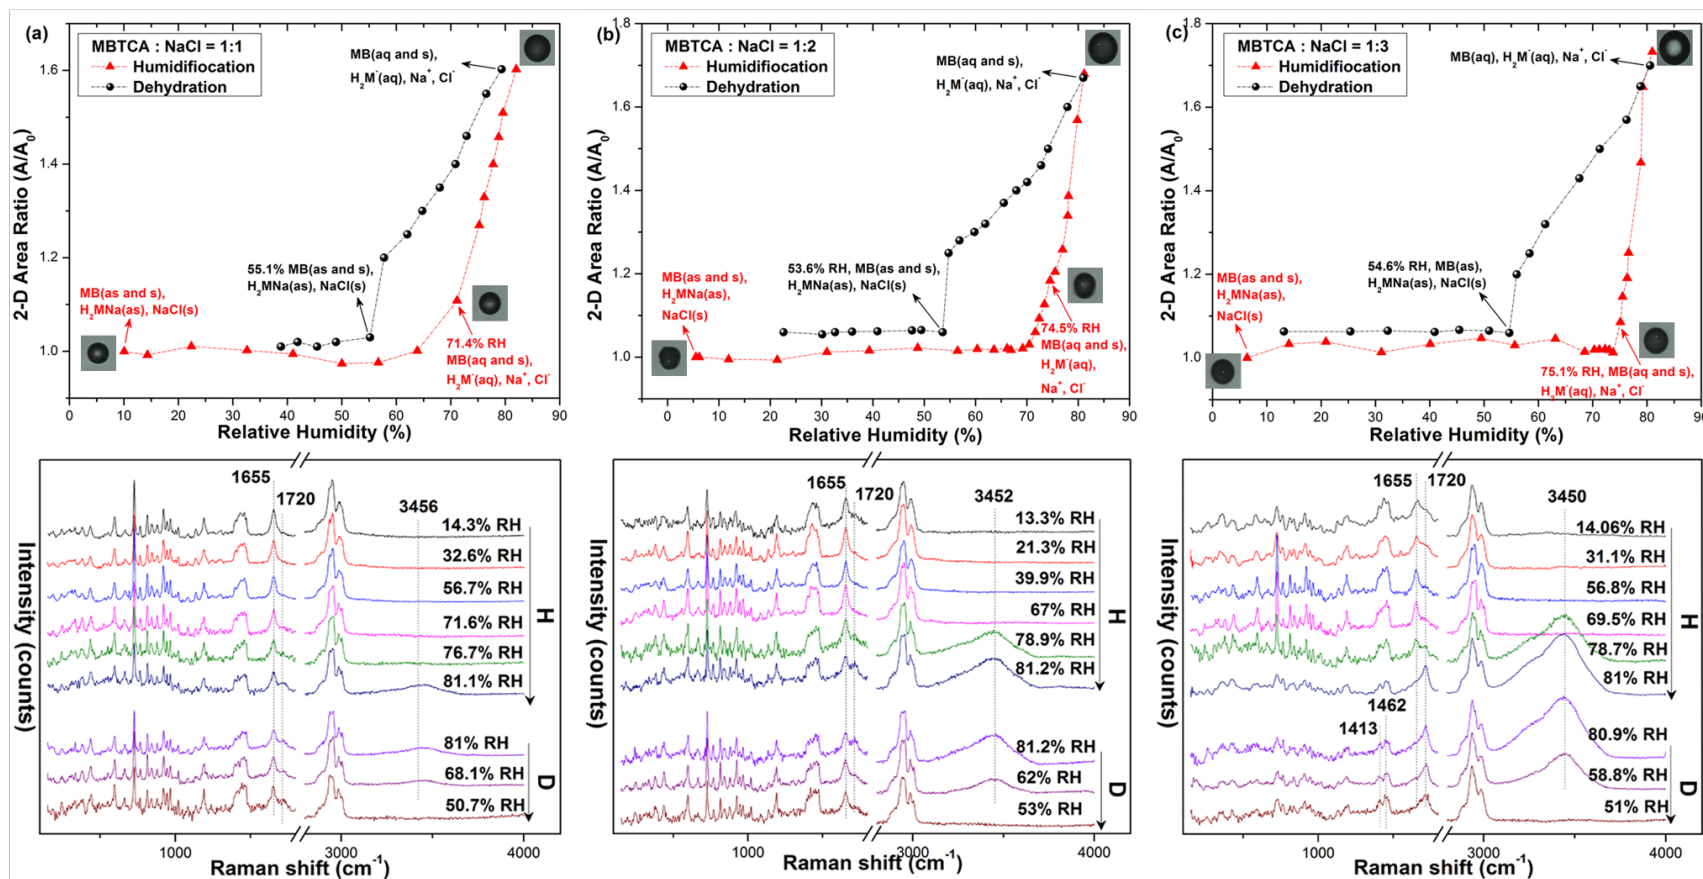

Supplement: Supplementary file 1 [file acp-2020-428-supplement.pdf]
